# Supplementary material for: Lower risk of incident dementia among Chinese older adults having three servings of vegetables and two servings of fruits a day
Source: Oxford University Press journal article supplement (doi:10.1093/ageing/afx018), 2017-01-30
Supplement: afx018_aa-16-0583-File001.doc [file afx018_aa-16-0583-File001.doc]

**SUPPLEMENTARY DATA**

**For Age and Ageing journal paper: *Lower risk of incident dementia among Chinese older adults having 3 servings of vegetables and 2 servings of fruits a day***

Appendix 1

The amount of vegetable and fruit intake was quantified as the number of servings of vegetables and fruits per day, which was estimated by taking into consideration of the portion size and variety of vegetables and the amount and type of fruits that the participants usually ate every day, with each serving equivalent to about 80 grams.

One serving of vegetables was defined as 1/2 bowl of cooked leafy vegetables (e.g. Chinese kale, spinach, and cabbage), 1/2 bowl of cooked gourds, 1/2 bowl of mushrooms, 1/2 bowl of beans or peas, or 1 bowl of raw leafy vegetables (lettuce and purple cabbage).

One serving of fruits was defined as 1 piece of medium-sized fruit (orange, apple, and pear), 2 pieces of small-sized fruit (plum and kiwi), 1/2 piece of large-sized fruit (banana, dragonfruit, and starfruit), 1/2 bowl of mini-sized fruit (grapes, cherries, and strawberries), or 1/2 bowl of cut fruit (papaya and watermelon).

References:

World Health Organization. 2015. Measuring intake of fruit and vegetables. http://www.who.int/dietphysicalactivity/publications/f&v_intake_measurement.pdf?ua=1 (20 June 2016, date last accessed).

Department of Health, The Government of the Hong Kong Special Administrative Region. Food type – fruits and vegetables. http://www.cheu.gov.hk/eng/info/Adults_4.htm (20 June 2016, date last accessed).

Appendix 2


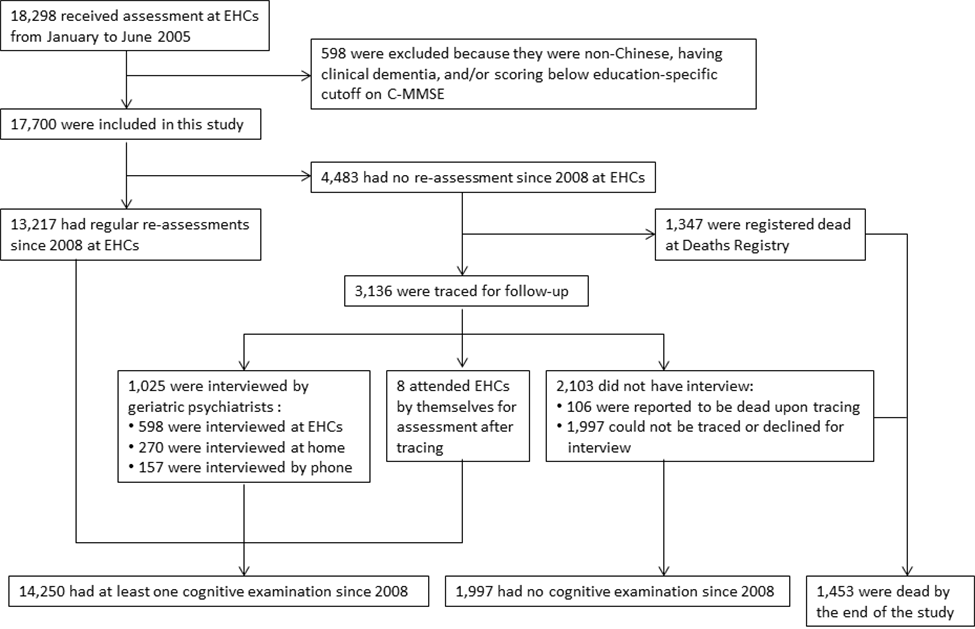


Figure. Flow diagram of inclusion and follow-up of participants in this study.

EHCs, Elderly Health Centres; C-MMSE, Cantonese version of the Mini-mental State Examination

Appendix 3

Comparison of baseline characteristics between participants diagnosed with incident dementia based on ICD-10 and those with Clinical Dementia Rating (CDR) score of 1 to 3.

|  | Incident dementia | | Statistics  (*P*-value) |
| --- | --- | --- | --- |
|  | ICD-10  (n=1,321) | CDR  (n=299) |
| Diabetes mellitus, n (%) | 218 (16.5) | 68 (22.7) | 0.01† |
| Heart disease, n (%) | 168 (12.7) | 69 (23.1) | <0.001† |
| Stroke, n (%) | 65 (4.9) | 33 (11.0) | <0.001† |

†χ2 test

Appendix 4

Longitudinal changes of proportion of participants who had less than 3 servings of vegetables and/or 2 servings of fruits a day over the first three years among those with incident dementia at Years 4 to 6 (n=330).

|  | Baseline | Year 3 | Statistics*  (*P*-value) |
| --- | --- | --- | --- |
| Vegetables, n (%) | 65 (19.7) | 64 (19.4) | 1.00 |
| Fruits, n (%) | 139 (42.1) | 135 (40.9) | 0.77 |
| Vegetables and fruits, n (%) | 168 (50.9) | 157 (47.6) | 0.32 |

*McNemar's test

Appendix 5

Comparison of proportion of participants maintaining consumption of at least 3 servings of vegetables and/or 2 servings of fruits a day in the first three years between those with and without incident dementia in the following three years.

|  | Incident dementia | | Statistics*  (*P*-value) |
| --- | --- | --- | --- |
| No | Yes |
| Vegetables, n (%) | 5,472 (90.4) | 236 (89.1) | 0.46 |
| Fruits, n (%) | 3,365 (79.4) | 140 (73.3) | 0.04 |
| Vegetables and fruits, n (%) | 2,827 (75.1) | 116 (71.6) | 0.32 |

*χ2 test
